# Supplementary material
Source: PubMed Central journal article supplement (PMC3207295)
Supplement: Tables_S1-S3_Figure_S1.pdf [file Tables_S1-S3_Figure_S1.pdf]

Modulation of clock Gene Expression by the Transcriptional Coregulator Receptor-  
Interacting Protein 140 (RIP140)

Ariel H.B. Poliandri, Joshua J. Gamsby, Mark Christian, Michael J. Spinella, Jennifer  
J. Loros, Jay C. Dunlap, and Malcolm G. Parker

**SUPPLEMENTARY ONLINE MATERIAL**

**Supplementary Table S1. QPCR primers**

| <b>Gene</b>                                                                | <b>Accession num.</b> | <b>Primers seq. 5'-&gt;3' FW/RV</b> |
|----------------------------------------------------------------------------|-----------------------|-------------------------------------|
| Mouse Beta-2-microglobulin (B2m)                                           | NM_009735.3           | TGGTGCTTGTCTCACTGACC                |
|                                                                            |                       | TATGTTCCGGCTTCCCATTCT               |
| Mouse Ribosomal Protein L13A (RPL13a)                                      | NM_009438.4           | GGAGAAACGGAAGGAAAAGG                |
|                                                                            |                       | GAGTCCGTTGGTCTTGAGGA                |
| Mouse TATA box binding protein (Tbp)                                       | NM_013684.3           | CAGCCTTCCACCTTATGCTC                |
|                                                                            |                       | CCGTAAGGCATCATTGGACT                |
| Mouse Nuclear receptor interacting protein 1 (Nrip1), (RIP140)             | NM_173440.            | CGACTGCTATGGGAGGTGAT                |
|                                                                            |                       | AGCCAAGCTCTTCTCCATGA                |
| Mouse aryl hydrocarbon receptor nuclear translocator-like (Arntl), (Bmal1) | NM_007489.3           | AAGTGCAACAGGCCTTCAGT                |
|                                                                            |                       | GGTGGCCAGCTTTTCAAATA                |
| Mouse Fatty acid synthase (Fas)                                            | NM_007988.3           | TGCGGAAACTTCAGGAAATG                |
|                                                                            |                       | AGAGACGTGTCACTCCTGGACTT             |
| Mouse Serol regulatory element binding factor 1c (Srebf1c), (SREBP1c)      | NM_011480.2           | CCAGAGGGTGAGCCTGACA                 |
|                                                                            |                       | AGCCTCTGCAATTTCCAGATCT              |
| Mouse Phosphoenolpyruvate carboxykinase 1 (Pck1), (PECK),                  | NM_011044.2           | ATCATCTTTGGTGGCCGTAG                |
|                                                                            |                       | CATGGCTGCTCCTACAAACA                |
| Mouse Circadian locomoter output cycles kaput (Clock)                      | NM_007715.5           | GAGGTCGTCCTTCAGCAGTC                |
|                                                                            |                       | TGTGACATGCCTTGTGGAAT                |
| Mouse Cryptochrome 1 (Cry1)                                                | NM_007771.3           | TTCCTGCTACTGCCCTGTG                 |
|                                                                            |                       | TTTTGCAGGGAAGCCTCTTA                |
| Mouse Cryptochrome 2 (Cry2)                                                | NM_009963.3           | ATGTGTTCCCAAGGCTGTTC                |
|                                                                            |                       | CCTCCTTGGCCATCTTCATA                |
| Mouse Period homolog 1 (Per1)                                              | NM_011065.3           | CCAGGATGTGGGTGTCTTCT                |
|                                                                            |                       | TTTCTGGGTGAAGTCCTTG                 |
| Mouse Period homolog 2 (Per2)                                              | NM_011066.2           | ATTGGGAGGCACAAAGTCAG                |
|                                                                            |                       | CAGTAGCCGGTGGATTTGTT                |
| Mouse RAR-related orphan receptor alpha (RORA),                            | NM_013646.1           | CCCCTACTGTTCCCTCACCA                |
|                                                                            |                       | CCAGGTGGGATTTGGATATG                |
| Human Beta-2-microglobulin (B2m)                                           | NM_004048             | TCTCTCTTTCTGGCCTGGAG                |
|                                                                            |                       | TCAATGTCCGGATGGATGAAA               |
| Human RPL13a                                                               | NM_012423             | CCGGAAGAAGAAACAGCTCA                |
|                                                                            |                       | TATTGGGCTCAGACCAGGAG                |
| Human Ribosomal Protein L19 (RPL19)                                        | NM_000981             | CATGGAACACATCCACAAGC                |
|                                                                            |                       | GCGTGCTTCCTTGGTCTTAG                |
| Human Aryl hydrocarbon receptor nuclear translocator-like (ARNTL), (Bmal1) | NM_001178.4           | GAGCAGCTCTCCTCCTCTGA                |
|                                                                            |                       | CGTCGTGCTCCAGAACATAA                |
| Human Clock homolog (mouse) (CLOCK),                                       | NM_004898.2           | AATTTTGATGGGTTGGTGGGA               |
|                                                                            |                       | AGCATTACCAGGAAGCATGG                |
| Human Neuronal PAS domain protein 2 (NPAS2)                                | NM_002518.3           | TGGGAACCTCAGGCTATGAC                |
|                                                                            |                       | ACCGGTAGCAACACGACTTC                |
| Human Cryptochrome 1 (Cry1)                                                | NM_004075             | CTGCTATTGCCCTGTTGGTT                |
|                                                                            |                       | TTTTGCAGGGAAGCCTCTTA                |
| Human Cryptochrome 2 (Cry2)                                                | NM_021117.2           | GTCCTGCAGTGCTTTCTTCC                |
|                                                                            |                       | GCTTTCAATTTGGGCAGGTA                |
| Human Period homolog 1 (Drosophila) (Per1)                                 | NM_002616.1           | TTCAGGCCTCAGGGACTTTA                |
|                                                                            |                       | CCCGGATCTTGGTACATAC                 |
| Human Period homolog 2 (Drosophila) (Per2)                                 | NM_022817.2           | CTGATTGAAACCCAGTGCT                 |
|                                                                            |                       | CGAAACCGAATGGGAGAATA                |
| <b>Gene</b>                                                                | <b>Accession num.</b> | <b>Primers seq. FW/RV</b>           |
| Human nuclear receptor subfamily 1, group D, member 1 (NR1D1) (Rev-erba)   | NM_021724.2           | CTTCCGTGACCTTTCTCAGC                |
|                                                                            |                       | TTCACGTTGAACAACGAAGC                |
| Human RAR-related orphan receptor A (RORA)                                 | NM_134262.2           | AAATCGCATCTGGAAACCTG                |
|                                                                            |                       | CACAATTGCCACATCACCTC                |

### Supplementary Table S2. Small interfering RNA sequences

| Gene                 | Duplex                                                          |
|----------------------|-----------------------------------------------------------------|
| hRIP140              | sense: GAAGAGGAUCAGAACUUUATT<br>antisense:UAAAGUUCUGAUCCUCUUCAT |
| hRORA (all variants) | sense: CCGAGAAGAUGGAAUACUATT<br>antisense:UAGUAUCCAUCUUCUCGGTG  |
| hRev-erba            | sense: AGCAGAACAUCCAGUACAATT<br>antisense:UUGUACUGGAUGUUCUGCUGG |
| NON CODING siRNA     | sense: UUCUCCGAACGUGUCACGUTT<br>antisense:ACGUGACACGUUCGGAGAATT |

### Supplementary Table S3. QPCR primers for Chip assay

| Primer pair    | Primers seq. 5'->3'FW/RV |
|----------------|--------------------------|
| hBmal1 ROREs   | CGACATTTAGGGAAGGCAGA     |
|                | CAATGAAGGCCAGGATTC       |
| hBmal1 Exon 20 | GAGCCTCTTGGAAGCAGATG     |
|                | TCCACCAGTAATGCACTTTGA    |
| hCry1 ROREs    | ATGGCTTTATTCTGGCATGG     |
|                | GCAACCAGTGGACGGTTTAG     |
| hCry1 3 prime  | GGTAACTGCCCCCATGATTA     |
|                | GTGTCCCCACACAAATCTCA     |

\*

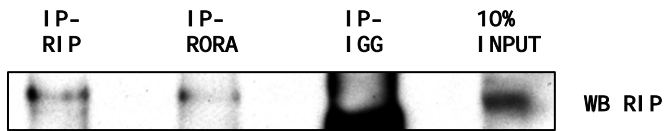

**Figure S1.** Total cell lysates from HepG2 cells were immunoprecipitated using anti RIP140, anti RORA or normal mouse IgG antibodies and western blot was performed using specific RIP140 antibody.
